# Supplementary material
Source: PubMed Central journal article supplement (PMC7927590)
Supplement: mmc1.pdf [file mmc1.pdf]

1 **Supplementary Material**

2 **Viability of SARS-CoV-2 in river water and wastewater at different**  
3 **temperatures and solids content**

4 Leonardo Oliveira<sup>a</sup>, Andrés Felipe Torres-Franco<sup>b</sup>, Bruna Coelho Lopes<sup>b</sup>, Beatriz Senra Álvares da  
5 Silva Santos<sup>c</sup>, Erica Azevedo Costa<sup>c</sup>, Michelle S. Costa<sup>d</sup>, Marcus Tullius P. Reis<sup>e</sup>, Marília C. Melo<sup>f</sup>,  
6 Rodrigo Bicalho<sup>g</sup>, Mauro Martins Teixeira<sup>a\*</sup>, César R. Mota<sup>b\*</sup>

7  
8 *<sup>a</sup>Biochemistry and Immunology Department, Federal University of Minas Gerais (UFMG), Belo Horizonte,*  
9 *Minas Gerais, Brazil*

10 *<sup>b</sup>Sanitary and Environmental Engineering Department, Federal University of Minas Gerais (UFMG), Belo*  
11 *Horizonte, Minas Gerais, Brazil*

12 *<sup>c</sup>Veterinary School, Federal University of Minas Gerais (UFMG), Belo Horizonte, Minas Gerais, Brazil.*

13 *<sup>d</sup>Minas Gerais State Health Authority (SES)*

14 *<sup>e</sup>Sanitation Company for Minas Gerais (COPASA)*

15 *<sup>f</sup>Minas Gerais Institute for Water Management (IGAM)*

16 *<sup>g</sup>Regulatory Agency for Water Supply and Sewage Services of the State of Minas Gerais (ARSAE)*

17  
18 \*Corresponding authors' email addresses: [cesar@desa.ufmg.br](mailto:cesar@desa.ufmg.br) and [mmtex.ufmg@gmail.com](mailto:mmtex.ufmg@gmail.com)

19

20

22 **1. Parameters of log-linear and nonlinear regressions for decay of SARS-CoV-2 in water**  
 23 **matrices**

24 **Table S.1** Model parameters estimated for the linear and nonlinear regressions for River Water (RW-  
 25 24°C), Filtered River Water (RWF-24°C), River Water at 4°C (RW-4°C), Wastewater (WW-24°C),  
 26 Filtered Wastewater (WWF-24°C) and Wastewater at 4°C (WW4°C)

| Model                                  | Parameters                                                                                                            | RMSE   | BIC    | T <sub>90</sub> (d) | T <sub>99</sub> (d) |
|----------------------------------------|-----------------------------------------------------------------------------------------------------------------------|--------|--------|---------------------|---------------------|
| <b>River Water (RW-24°C)</b>           |                                                                                                                       |        |        |                     |                     |
| Log-linear                             | 0- 10 d; m = -0.0153*; b= -0.3591<br>R <sup>2</sup> = 0.649; F-value= 43.56*<br>Shapiro-wilk p<0.05; Skew.ratio -2.04 | 0.8017 | 67.0   | 2.17<br>(1.37-3.05) | 4.02<br>(3.19-4.85) |
| Exp-nls                                | a= 0.9744*; b= 0.0646*                                                                                                | 0.0559 | -69.14 | 1.46                | 2.95                |
| Exp-biphasic                           | a <sub>1</sub> = 0.6564*; b <sub>1</sub> = 0.1177*;<br>a <sub>2</sub> = 0.3444; b <sub>2</sub> = 0.02765*             | 0.0478 | 71.09  | 1.87                | 5.33                |
| Weibull                                | Asym= 0.999; Drop= 1.0311*<br>Lrc= 1.7577* ; Pwr= -0.9808*                                                            | 0.0486 | 70.19  | 1.91                | 6.41                |
| Gompertz                               | Asym= 0.0122*; b <sub>2</sub> = -4.39*; b <sub>3</sub> = 0.981*                                                       | 0.0490 | -72.83 | 1.66                | >360                |
| <b>Filtered River Water (RWF-24°C)</b> |                                                                                                                       |        |        |                     |                     |
| Log-linear                             | 0- 10 d; m = -0.0135*; b= -0.0755<br>R <sup>2</sup> = 0.821; F-value= 106.8*<br>Shapiro-wilk p<0.05; Skew.ratio -3.82 | 0.4525 | 39.58  | 2.89<br>(2.33-3.46) | 5.45<br>(4.72-6.17) |
| Exp-nls                                | a= 0.9287*; b= 0.041*                                                                                                 | 0.0795 | -50.15 | 2.22                | 4.56                |
| Exp-biphasic                           | a <sub>1</sub> = 0.3837*; b <sub>1</sub> = 0.2255*<br>a <sub>2</sub> = 0.6163*; b <sub>2</sub> = 0.0266*              | 0.0633 | -55.9  | 2.87                | 6.36                |
| Weibull                                | Asym= 0.998; Drop= 1.102*<br>Lrc= 1.295*; Pwr= -0.6601*                                                               | 0.0665 | -53.22 | 3.25                | 8.48                |
| Gompertz                               | *No start parameters found                                                                                            |        |        |                     |                     |

28 **Table S.1** Model parameters estimated for the linear and nonlinear regressions for River Water (RW-  
 29 24°C), Filtered River Water (RWF-24°C), River Water at 4°C (RW-4°C), Wastewater (WW-24°C),  
 30 Filtered Wastewater (WWF-24°C) and Wastewater at 4°C (WW4°C)

| Model                              | Parameters                                                                                                            | RMSE   | BIC    | T <sub>90</sub> (d) | T <sub>99</sub> (d)   |
|------------------------------------|-----------------------------------------------------------------------------------------------------------------------|--------|--------|---------------------|-----------------------|
| <b>River Water at 4°C (RW-4°C)</b> |                                                                                                                       |        |        |                     |                       |
| Log-linear                         | 0- 36 d; m = -0.0065*; b= -0.0191<br>R <sup>2</sup> = 0.761; F-value= 83.91*<br>Shapiro-wilk p<0.05; Skew.ratio -5.73 | 0.4049 | 37.69  | 5.83<br>(4.89-9.03) | 10.72<br>(9.03-12.41) |
| Exp-nls                            | a= 1.001*; b= 0.018*                                                                                                  | 0.0827 | -48.02 | 5.25                | 10.41                 |
| Exp-biphasic                       | a <sub>1</sub> = 0.640*; b <sub>1</sub> = 0.0399*<br>a <sub>2</sub> = 0.406*; b <sub>2</sub> = 0.007*                 | 0.0633 | -56.80 | 7.83                | 20.7                  |
| Weibull                            | Asym= 1.013; Drop= 1.105*<br>Lrc= 2.3969*; Pwr= -0.779*                                                               | 0.0636 | -55.65 | 7.7                 | 18.7                  |
| Gompertz                           | Asym= 0.0387*; b <sub>2</sub> = -3.28*; b <sub>3</sub> = 0.992*                                                       | 0.0728 | -51.66 | 6.95                | >360                  |
| <b>Wastewater (WW-24°C)</b>        |                                                                                                                       |        |        |                     |                       |
| Log-linear                         | 0- 5 d; m = -0.0348*; b= -0.0399<br>R <sup>2</sup> = 0.791; F-value= 76.72*<br>Shapiro-wilk p<0.05; Skew.ratio -1.00  | 0.7350 | 55.8   | 1.35<br>(0.92-1.77) | 2.31<br>(1.93-2.69)   |
| Exp-nls                            | a= 0.995*; b= 0.0825*                                                                                                 | 0.0767 | -118   | 1.13                | 2.31                  |
| Exp-biphasic                       | a <sub>1</sub> = 0.8627*; b <sub>1</sub> = 0.096*<br>a <sub>2</sub> = 0.138; b <sub>2</sub> = 0.0354*                 | 0.0213 | -114.7 | 1.21                | 3.12                  |
| Weibull                            | Asym= 0.997; Drop= 1.015*<br>Lrc= 2.258*; Pwr= -1.300*                                                                | 0.0224 | -111.8 | 1.17                | 4                     |
| Gompertz                           | Asym= 7.65E-05*; b <sub>2</sub> = -9.47E00*; b <sub>3</sub> = 9.90E-01*                                               | 0.0214 | -117.7 | 1.21                | 2.91                  |

31

32

33 **Table S.1** Model parameters estimated for the linear and nonlinear regressions for River Water (RW-  
 34 24°C), Filtered River Water (RWF-24°C), River Water at 4°C (RW-4°C), Wastewater (WW-24°C),  
 35 Filtered Wastewater (WWF-24°C) and Wastewater at 4°C (WW4°C)

| Model                                 | Parameters                                                                                                          | RMSE   | BIC    | T <sub>90</sub> (d) | T <sub>99</sub> (d) |
|---------------------------------------|---------------------------------------------------------------------------------------------------------------------|--------|--------|---------------------|---------------------|
| <b>Filtered Wastewater (WWF-24°C)</b> |                                                                                                                     |        |        |                     |                     |
| Log-linear                            | 0- 5 d; m = -0.0334*; b= 0.1503<br>R <sup>2</sup> = 0.796; F-value= 79.43*<br>Shapiro-wilk p<0.05; Skew.ratio -1.51 | 0.6959 | 53.5   | 1.57<br>(1.17-1.97) | 2.57<br>(2.19-2.95) |
| Exp-nls                               | a= 1.071*; b= 0.054*                                                                                                | 0.0827 | -52.1  | 1.46                | 2.95                |
| Exp-biphasic                          | *No start parameters found                                                                                          | -      | -      | -                   | -                   |
| Weibull                               | Asym= 0.999; Drop= 1.010*<br>Lrc= 3.796* ; Pwr= -1.636*                                                             | 0.052  | -66.52 | 1.54                | 4.5                 |
| Gompertz                              | *No start parameters found                                                                                          | -      | -      | -                   | -                   |
| <b>Wastewater at 4°C (WW-4°C)</b>     |                                                                                                                     |        |        |                     |                     |
| Log-linear                            | 0- 36 d; m = -0.008*; b= -0.08<br>R <sup>2</sup> = 0.752; F-value= 80.77*<br>Shapiro-wilk p<0.05; Skew.ratio -5.05  | 0.5094 | 50.08  | 4.67<br>(3.72-5.61) | 8.6<br>(7.26-9.93)  |
| Exp-nls                               | a= 0.9344*; b= 0.027*                                                                                               | 0.0867 | -49.37 | 3.33                | 6.71                |
| Exp-biphasic                          | a <sub>1</sub> = 0.6792*; b <sub>1</sub> = 0.0712*<br>a <sub>2</sub> = 0.3237*; b <sub>2</sub> = 0.0084*            | 0.0622 | -56.79 | 5.79                | 17.1                |
| Weibull                               | Asym= 1.001; Drop= 1.071*<br>Lrc= 1.618*; Pwr= -0.6911*                                                             | 0.0619 | -57.11 | 5.5                 | 17.5                |
| Gompertz                              | Asym= 0.058*; b <sub>2</sub> = -2.815*;<br>b <sub>3</sub> = 0.9848*                                                 | 0.0679 | -55.42 | 4.54                | >360                |

36

37

38

39 **2. Parameters of log-linear and nonlinear regressions for decay of SARS-CoV-2 in water**  
40 **matrices**

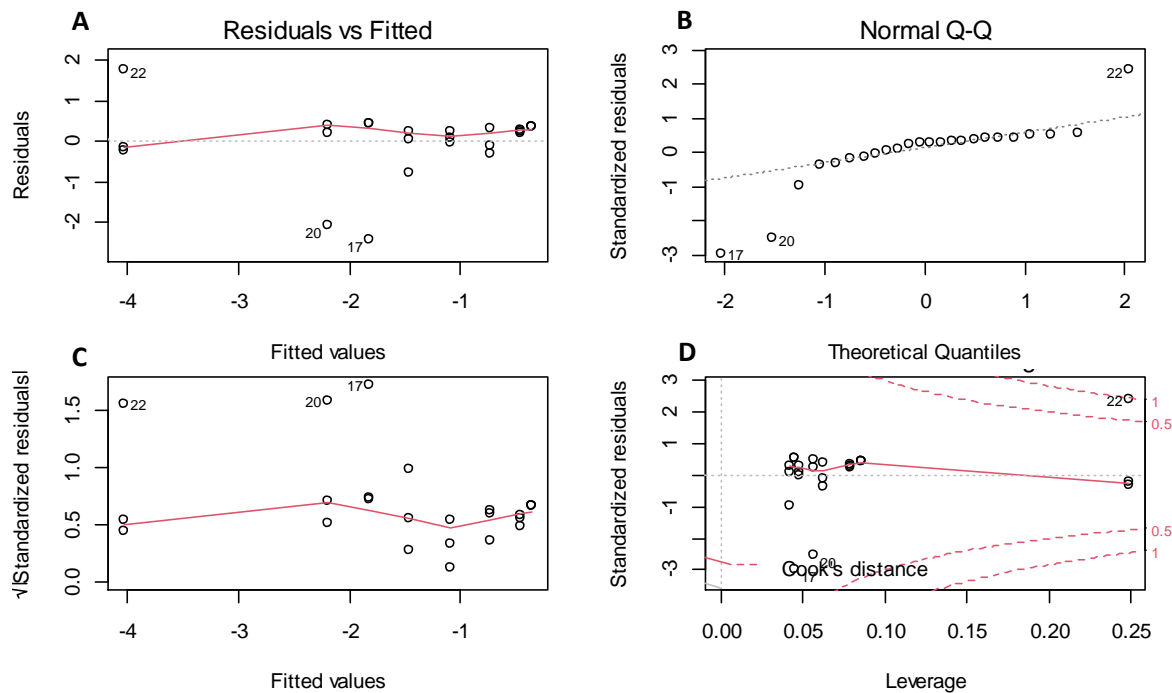

41  
42 **Figure S1** Linear model fit on Log-transformed data of virus survival in River Water (RW-24°C)  
43 assessed by graphs of (a) Residuals Vs Fitted values (b) Normal Q-Q plot; (c) Scale Location and  
44 (d) Outliers identification by Leverage and Cook Distance

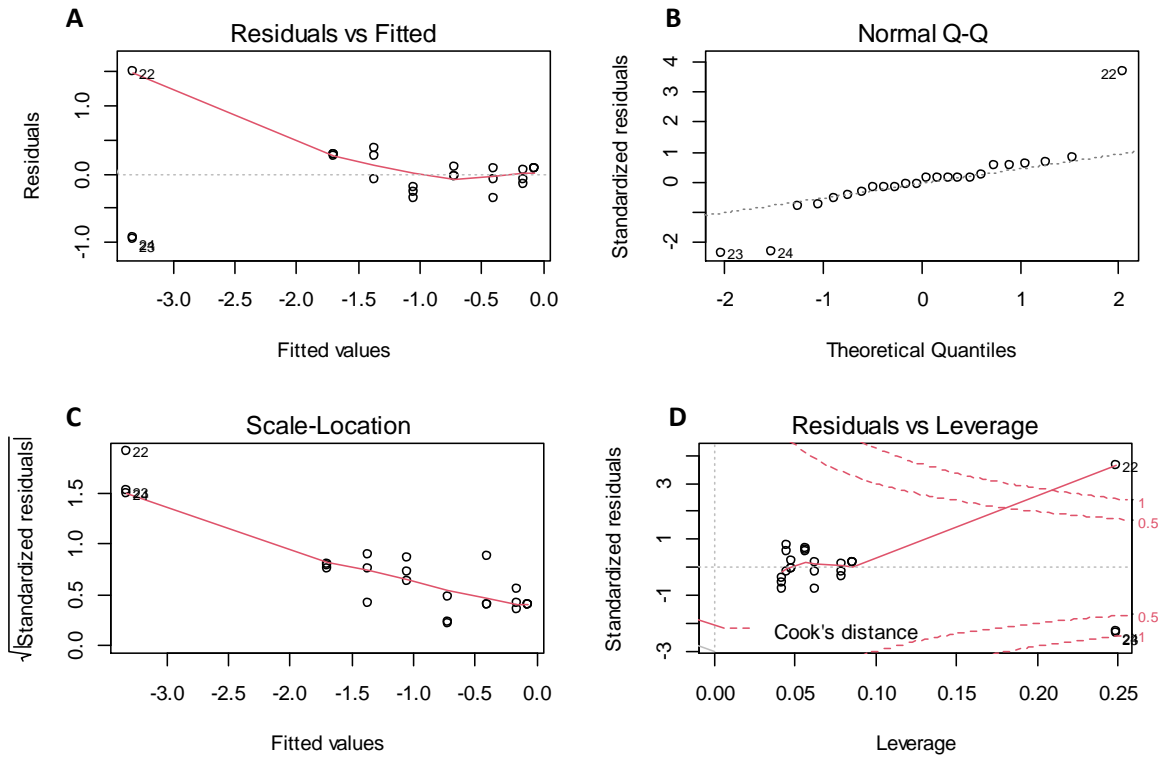

45

46 **Figure S2.** Linear model fit on Log-transformed data of virus survival in Filtered River Water  
 47 (RWF-24°C) assessed by graphs of (a) Residuals Vs Fitted values (b) Normal Q-Q plot; (c) Scale  
 48 Location and (d) Outliers identification by Leverage and Cook Distance

49

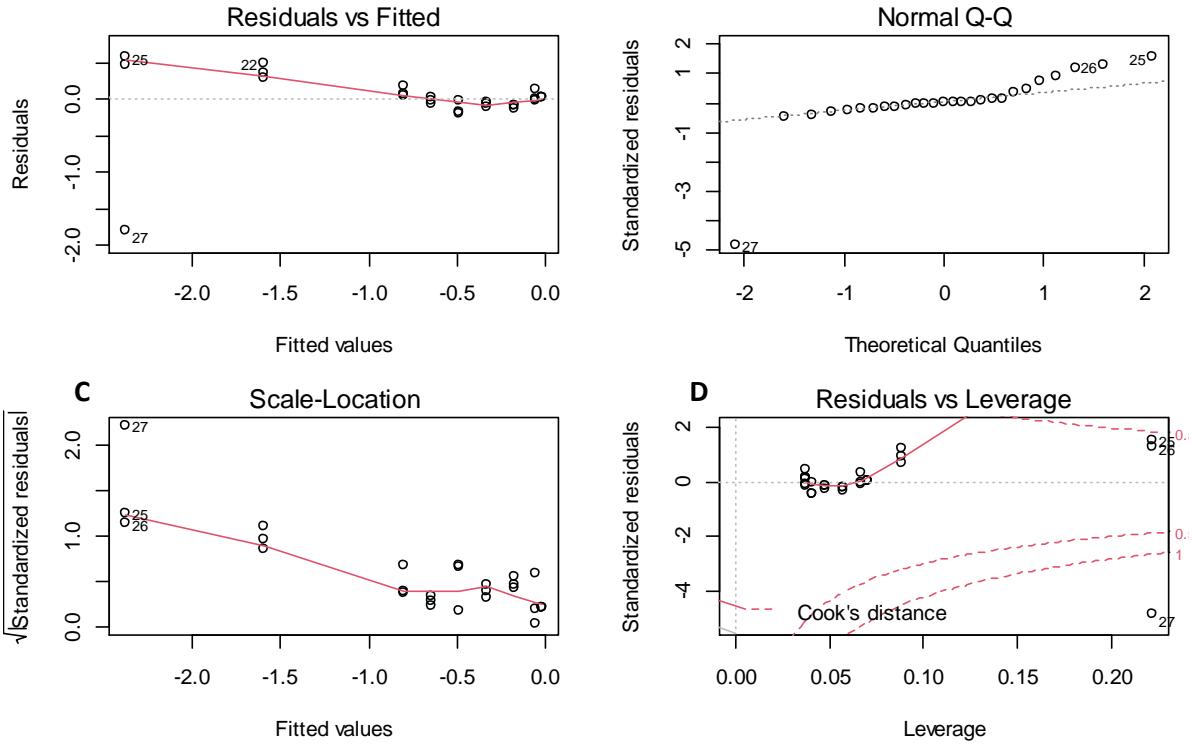

50

51 **Figure S3.** Linear model fit on Log-transformed data of virus survival in River Water at 4°C (RW-  
 52 4°C) assessed by graphs of (a) Residuals Vs Fitted values (b) Normal Q-Q plot; (c) Scale Location  
 53 and (d) Outliers identification by Leverage and Cook Distance

54

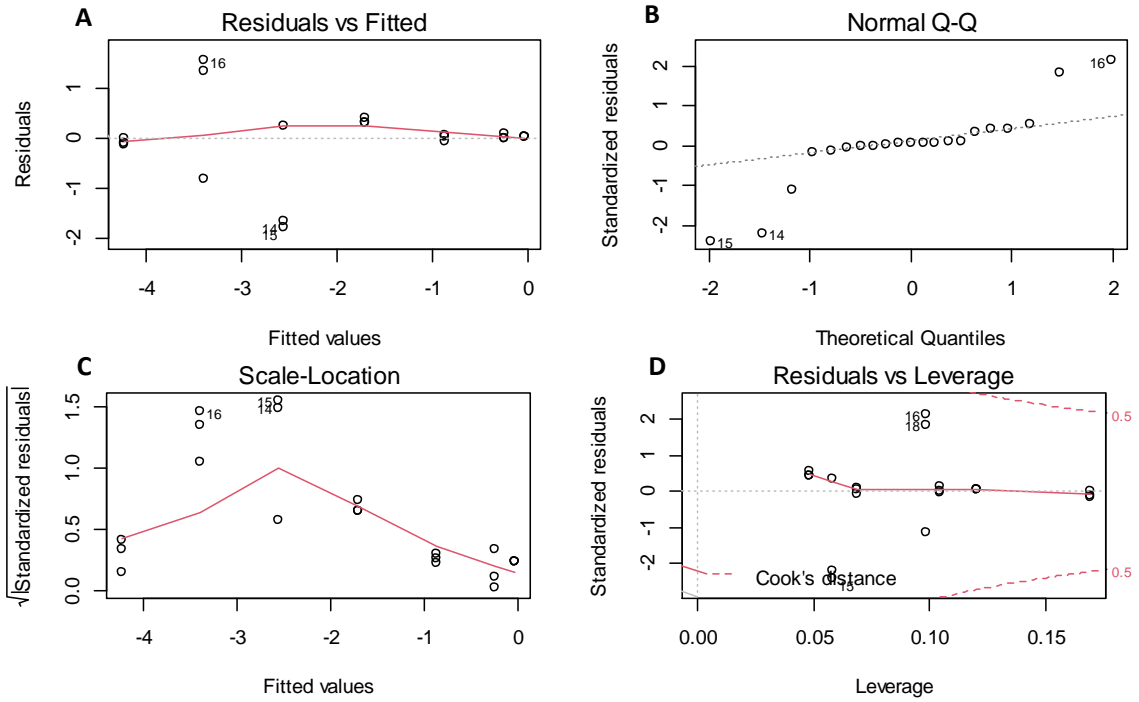

55

56 **Figure S4.** Linear model fit on Log-transformed data of virus survival in Wastewater (WW-24°C)

57 assessed by graphs of (a) Residuals Vs Fitted values (b) Normal Q-Q plot; (c) Scale Location and

58 (d) Outliers identification by Leverage and Cook Distance

59

60



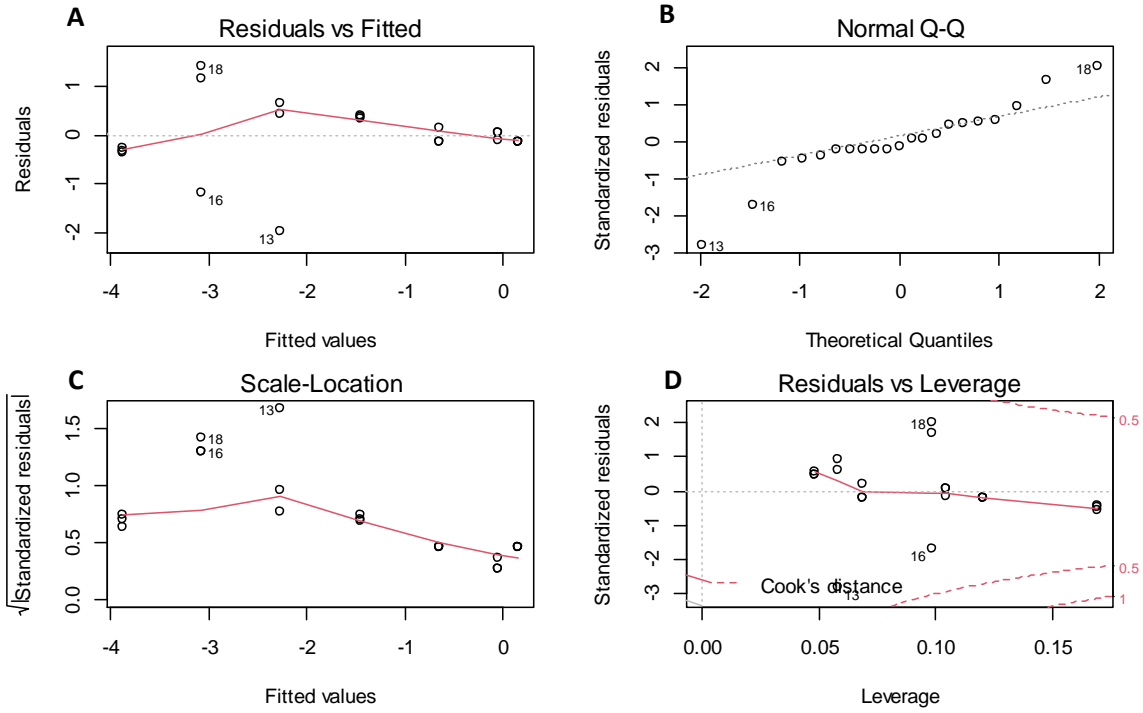

61

62 **Figure S5.** Linear model fit on Log-transformed data of virus survival in Filtered Wastewater

63 (WWF-24°C) assessed by graphs of (a) Residuals Vs Fitted values (b) Normal Q-Q plot; (c) Scale

64 Location and (d) Outliers identification by Leverage and Cook Distance

65

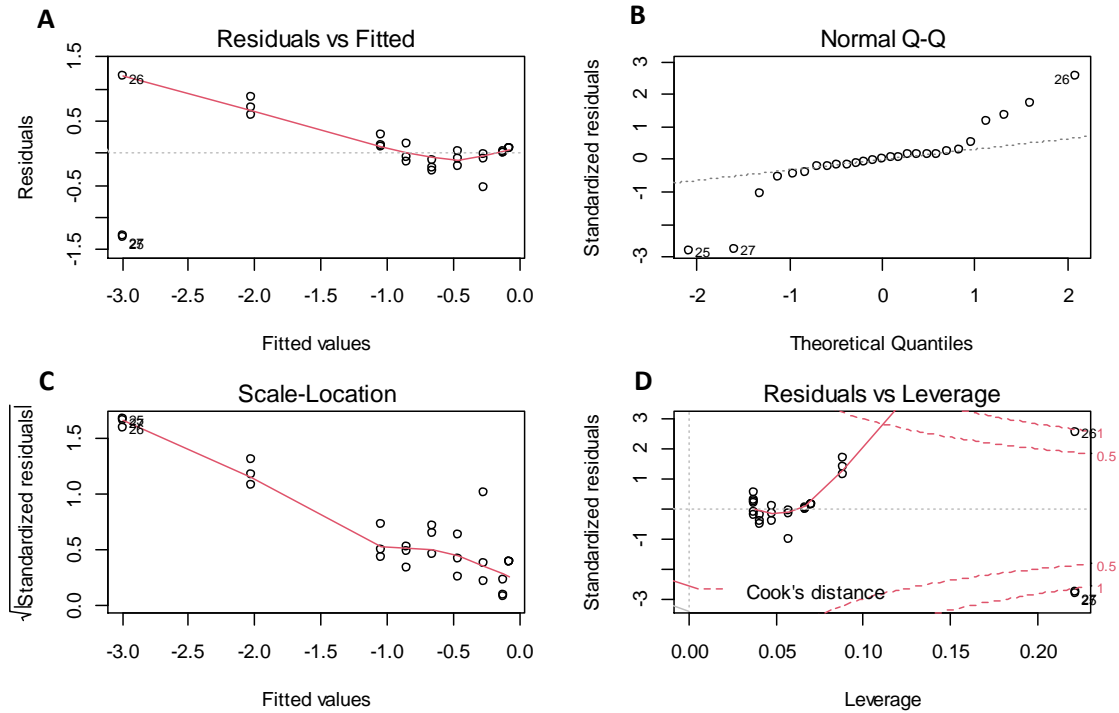

66

67 **Figure S6.** Linear model fit on Log-transformed data of virus survival in Wastewater at 4°C (WW-  
 68 4°C) assessed by graphs of (a) Residuals Vs Fitted values (b) Normal Q-Q plot; (c) Scale Location  
 69 and (d) Outliers identification by Leverage and Cook Distance

70

### 71 3. Estimation of Arrhenius equation's parameters o

72 **Arrhenius equation:** The effect of temperature on the inactivation rate was modelled using the  
 73 Arrhenius equation as presented in eq S.1

$$74 \ln(k) = \left(\frac{E_a}{R}\right) \left(\frac{1}{T}\right) + \ln(A)$$

75 Where k is the first-order decay constant (1/min),  $E_a$  in the energy of activation of the decay

76 reaction, T is the temperature in Kelvin, R is the gas constant (8.31J·/(mol k)) and ln(A) is the

77 intercept in 1/min.  $E_a$  was determined from the slopes in Figure S.7

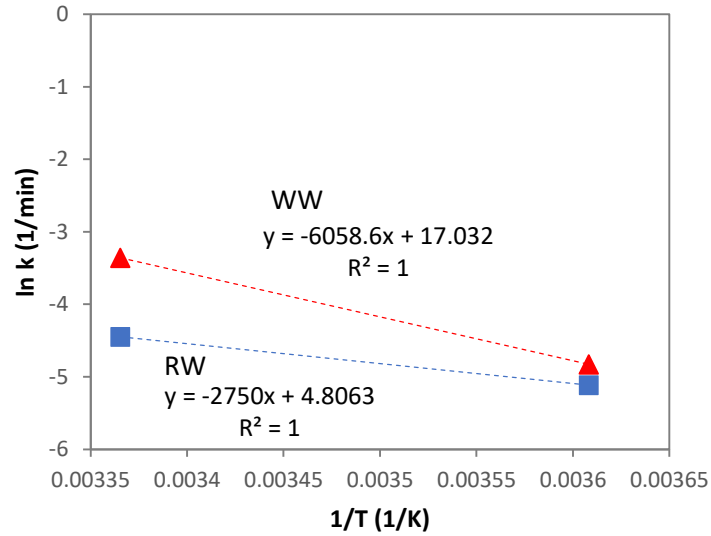

78

79 **Figure S7.** Arrhenius equation solutions for river water (RW) and wastewater (WW) calculated  
 80 from first-decay constants at 24 °C and 4 °C.

81

82 **4. Spearman correlations between physicochemical composition and Weibull-estimated**  
 83 **T<sub>90</sub> and T<sub>99</sub> values**

84

85 **Table S.2** Spearman correlations between physicochemical composition and Weibull-estimated T<sub>90</sub>  
 86 and T<sub>99</sub> values

|                 | pH       | Turbidity | Ammonia-N | COD     | T <sub>90</sub> | T <sub>99</sub> |
|-----------------|----------|-----------|-----------|---------|-----------------|-----------------|
| pH              |          | 0.33333   | 0.5       | 0.16667 | 0.16667         | 0.16667         |
| Turbidity       | 0.94281  |           | 0.66667   | 0.33333 | 0.33333         | 0.33333         |
| Ammonia-N       | 0.63246  | 0.44721   |           | 0.33333 | 0.33333         | 0.33333         |
| COD             | 0.94868  | 0.89443   | 0.8       |         | 0.083333        | 0.083333        |
| T <sub>90</sub> | -0.94868 | -0.89443  | -0.8      | -1      |                 | 0.083333        |
| T <sub>99</sub> | -0.94868 | -0.89443  | -0.8      | -1      | 1               |                 |

87
